# Supplementary material for: Valorization of Rice Straw for Optimization of Production of Thermotolerant Cellulase by Parageobacillus Thermoglucosidasius NBCB1 Under Submerged Fermentation
Source: Research Square preprint supplement (doi:10.21203/rs.3.rs-1450600/v1), 2022-03-22
Supplement: Supplementary file 1 [file 6f5b1bade1b427536fd3e6f9.docx]

**Article Title**: Valorization of agro-industrial paddy waste for optimization of thermotolerant exoglucanase production by *Parageobacillus thermoglucosidasius* NBCB1 under submerged fermentation

**Journal name:** BioEnergy Research

**Author names**: Arijita Basak1, Parmeshwar Vitthal Gavande1, Nensina Murmu1, Shilpi Ghosh1,*

**Affiliation:** 1Department of Biotechnology, University of North Bengal, Raja Rammohunpur, Darjeeling, West Bengal-734013, India

* **Corresponding author:**

Shilpi Ghosh

Department of Biotechnology, University of North Bengal, Raja Rammohunpur, Darjeeling, West Bengal, India

1. Mail: shilpighosh@nbu.ac.in

**Online Resource 1** Diagnostic plots for the CCRD model as generated through RSM **(a)** Normal plot **(b)** Residuals vs predicted plot **(c)** Residuals vs run plot **(d)** Predicted vs actual values
