# Supplementary material for: Valorization of Rice Straw for Optimization of Production of Thermotolerant Cellulase by Parageobacillus Thermoglucosidasius NBCB1 Under Submerged Fermentation
Source: Research Square preprint supplement (doi:10.21203/rs.3.rs-1450600/v1), 2022-03-22
Supplement: Supplementary file 2 [file a78b677eef9a252781d1cf26.docx]

**Article Title**: Valorization of agro-industrial paddy waste for optimization of thermotolerant exoglucanase production by *Parageobacillus thermoglucosidasius* NBCB1 under submerged fermentation

**Journal name:** BioEnergy Research

**Author names**: Arijita Basak1, Parmeshwar Vitthal Gavande1, Nensina Murmu1, Shilpi Ghosh1,*

**Affiliation:** 1Department of Biotechnology, University of North Bengal, Raja Rammohunpur, Darjeeling, West Bengal-734013, India

* **Corresponding author:**

Shilpi Ghosh

Department of Biotechnology, University of North Bengal, Raja Rammohunpur, Darjeeling, West Bengal, India

1. Mail: shilpighosh@nbu.ac.in

**Online Resource 2** Toolbox parameters for GA based global optimization of culture parameters

| **Parameter** | **Value** |
| --- | --- |
| Solver | Genetic Algorithm (ga) |
| Fitness function (untitled2.m) with main script (main3.m) | @untitled2  function y=untitled2(x)  y= -(0.2552 +0.0325*x(1) -0.0333*x(2) -0.01728*x(3) +0.0075*x(4) -0.0131*x(1)*x(2) -0.0101*x(1)*x(3) -0.00628*x(1)*x(4) +0.0063*x(2)*x(3) -0.0001*x(2)*x(4) -0.0086*x(3)*x(4) -0.0411*x(1)*x(1) -0.0347*x(2)*x(2) -0.0371*x(3)*x(3) -0.0121*x(4)*x(4));  end  main3.m  clc  clear  close all  FitFcn=@untitled2;  nvars=4;  [x,fval]=ga(FitFcn.nvars); |
| Total number of variables | 4 |
| Lower bound | [2 4 0.5 0.5] |
| Upper bound | [4 8 1.5 1.5] |
| Population type | Double vector |
| Population size | Default (50) |
| Creation function | Feasible population |
| Scaling function | Rank |
| Selection function | Tournament |
| Mutation function | Adaptive feasible |
| Crossover function | Single point |
| Crossover fraction | 0.8 |
| Stopping generations | 100 |
| Function tolerance | Default (1e-6) |
